# Supplementary material
Source: PubMed Central journal article supplement (PMC9125936)
Supplement: 13054_2022_4011_MOESM1_ESM.pdf [file 13054_2022_4011_MOESM1_ESM.pdf]

# **Extracorporeal membrane oxygenation for coronavirus disease 2019: an updated systematic review and meta-analysis**

*Supplementary appendix*

\*Ryan Ruiyang Ling,

\*Kollengode Ramanathan, MD,

Jackie Jia Lin Sim,

Suei Nee Wong, MSc,

Ying Chen, PhD,

Faizan Amin, MD,

Shannon M. Fernando, MD,

Bram Rochweg, MD,

Eddy Fan, PhD,

Ryan P Barbaro, MD,

Graeme MacLaren MSc,

†Kiran Shekar, PhD,

†Prof Daniel Brodie, MD.

---

\*Joint first authors

†Joint senior authors

## **Corresponding author**

Kollengode Ramanathan,

Cardiothoracic Intensive Care Unit, National University Heart Centre, National University Hospital,  
Level 9, 1E Kent Ridge Road, Singapore 119228

Email: [surrkr@nus.edu.sg](mailto:surrkr@nus.edu.sg)

## Table of Contents

|                                                                                                                                                                                                                                             |    |
|---------------------------------------------------------------------------------------------------------------------------------------------------------------------------------------------------------------------------------------------|----|
| <b>Figure S1.</b> Pooled mortality among patients receiving venovenous extracorporeal membrane oxygenation for coronavirus disease 2019.....                                                                                                | 3  |
| <b>Figure S2.</b> Pooled mortality among patients receiving extracorporeal membrane oxygenation for coronavirus disease 2019 stratified by region. ....                                                                                     | 4  |
| <b>Figure S3.</b> Pooled duration of ECMO support .....                                                                                                                                                                                     | 5  |
| <b>Figure S4.</b> Pooled intensive care unit length of stay amongst patients receiving extracorporeal membrane oxygenation for coronavirus disease 2019.....                                                                                | 5  |
| <b>Figure S5.</b> Pooled hospital length of stay among patients receiving extracorporeal membrane oxygenation for coronavirus disease 2019.....                                                                                             | 6  |
| <b>Figure S6.</b> Association between time of last patient enrolment since 1 January 2020 (per 100 days) with duration of extracorporeal membrane oxygenation support, intensive care unit length of stay, and hospital length of stay..... | 7  |
| <b>Figure S7.</b> Association between average time patient enrolment since 1 January 2020 (per 100 days, defined as midpoint between date of first and last patient enrolment) and mortality.....                                           | 8  |
| <b>Figure S8.</b> Post-hoc subgroup analysis of mortality for patients receiving extracorporeal membrane oxygenation for coronavirus disease 2019, stratified by duration of follow up. ....                                                | 9  |
| <b>Table S1.</b> Preferred Reporting Items for Systematic reviews and Meta-Analyses (PRISMA) 2020 Checklist.....                                                                                                                            | 10 |
| <b>Table S3.</b> Data collection template .....                                                                                                                                                                                             | 15 |
| <b>Table S4a.</b> Demographics and outcomes of included studies .....                                                                                                                                                                       | 16 |
| <b>Table S4b.</b> Pre-ECMO ventilatory parameters .....                                                                                                                                                                                     | 19 |
| <b>Table S5.</b> Joanna Briggs Institute Checklist.....                                                                                                                                                                                     | 21 |
| <b>Table S6.</b> Grading of Recommendations, Assessment, Development, and Evaluations.....                                                                                                                                                  | 23 |
| <b>Table S7.</b> Summary of subgroup and meta-regression analysis .....                                                                                                                                                                     | 24 |
| <b>Table S8:</b> Complications reported by included studies .....                                                                                                                                                                           | 25 |

**Figure S1.** Pooled mortality among patients receiving venovenous extracorporeal membrane oxygenation for coronavirus disease 2019.

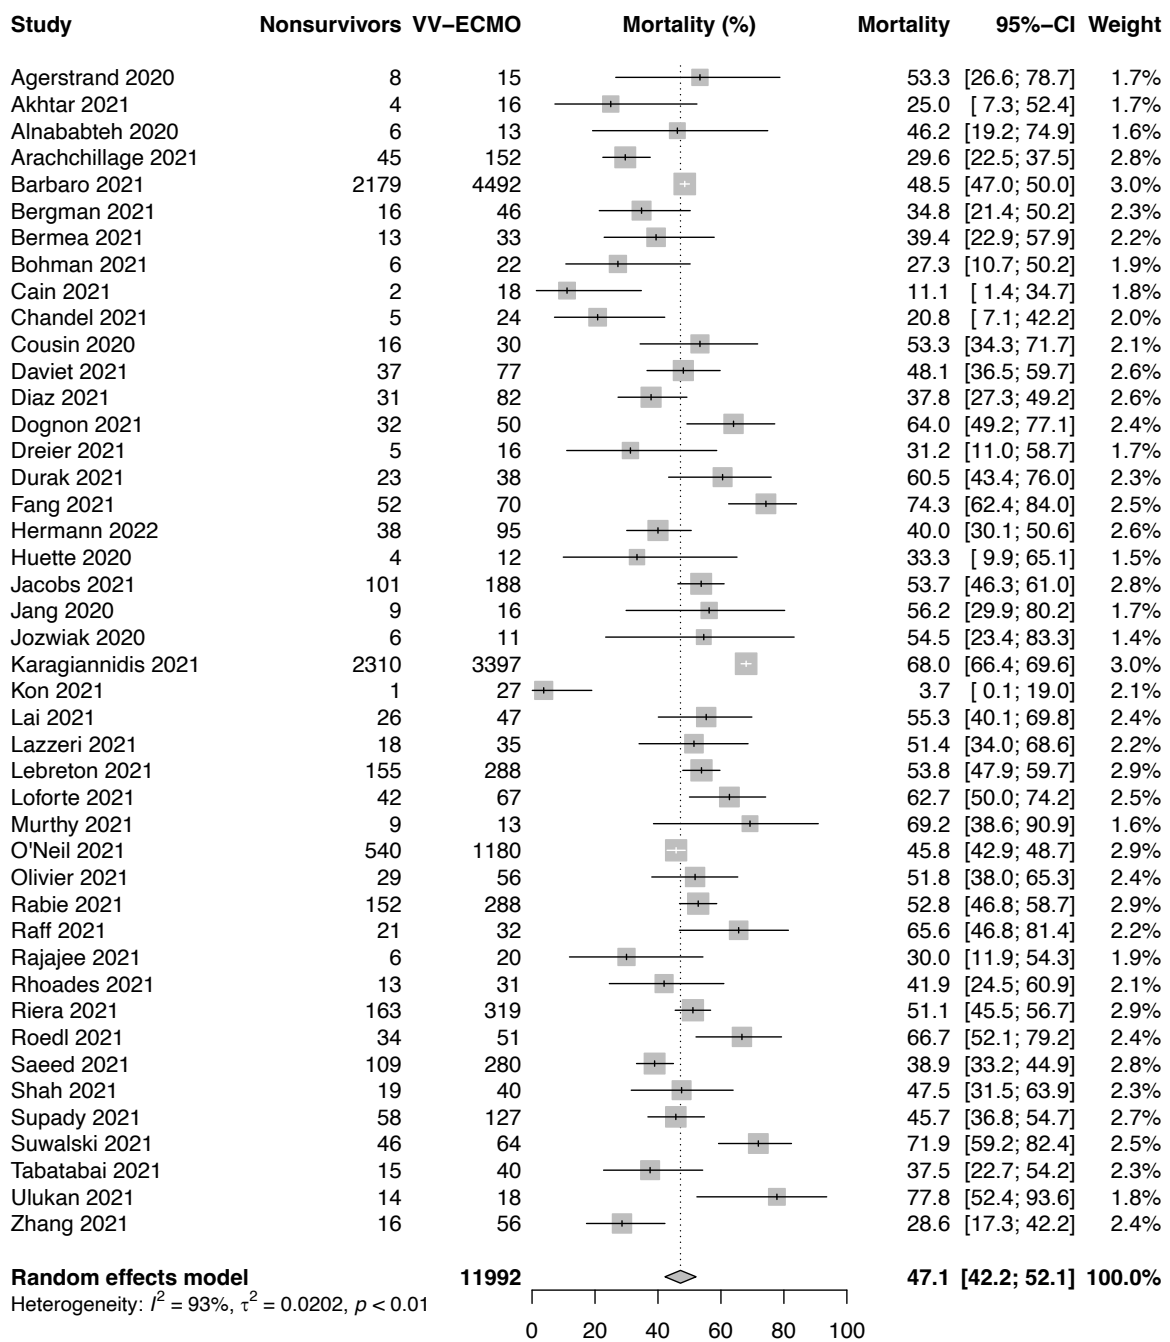

**Figure S2.** Pooled mortality among patients receiving extracorporeal membrane oxygenation for coronavirus disease 2019 stratified by region.

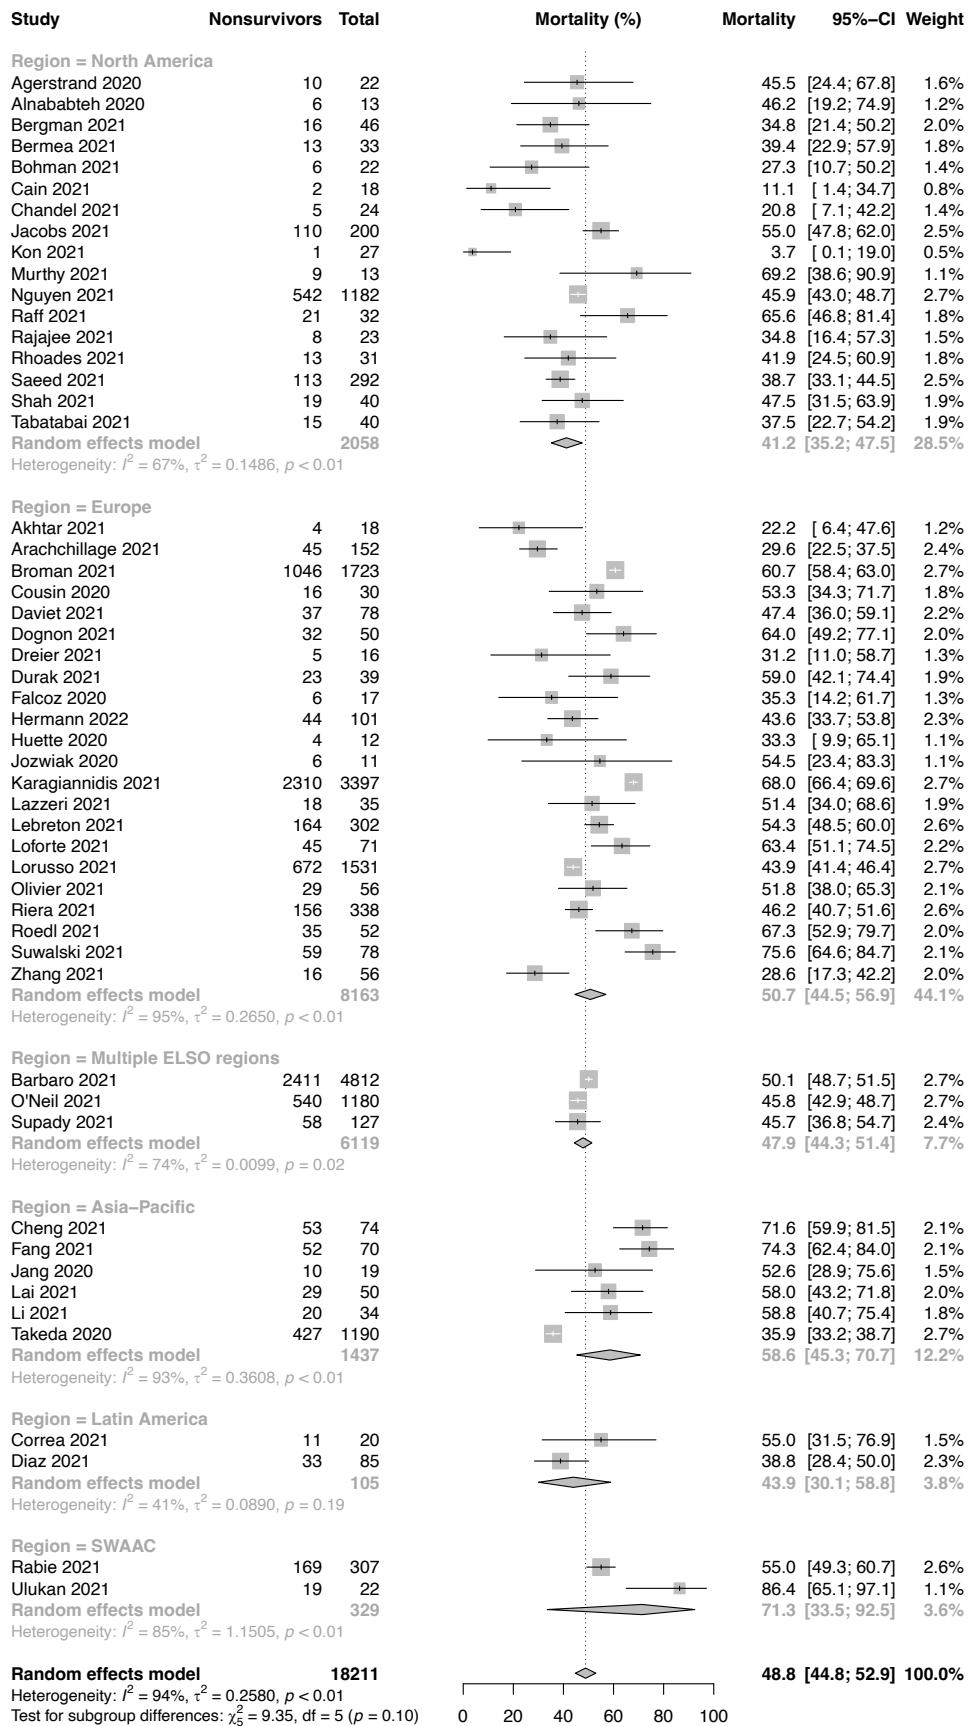

**Figure S3.** Pooled duration of ECMO support

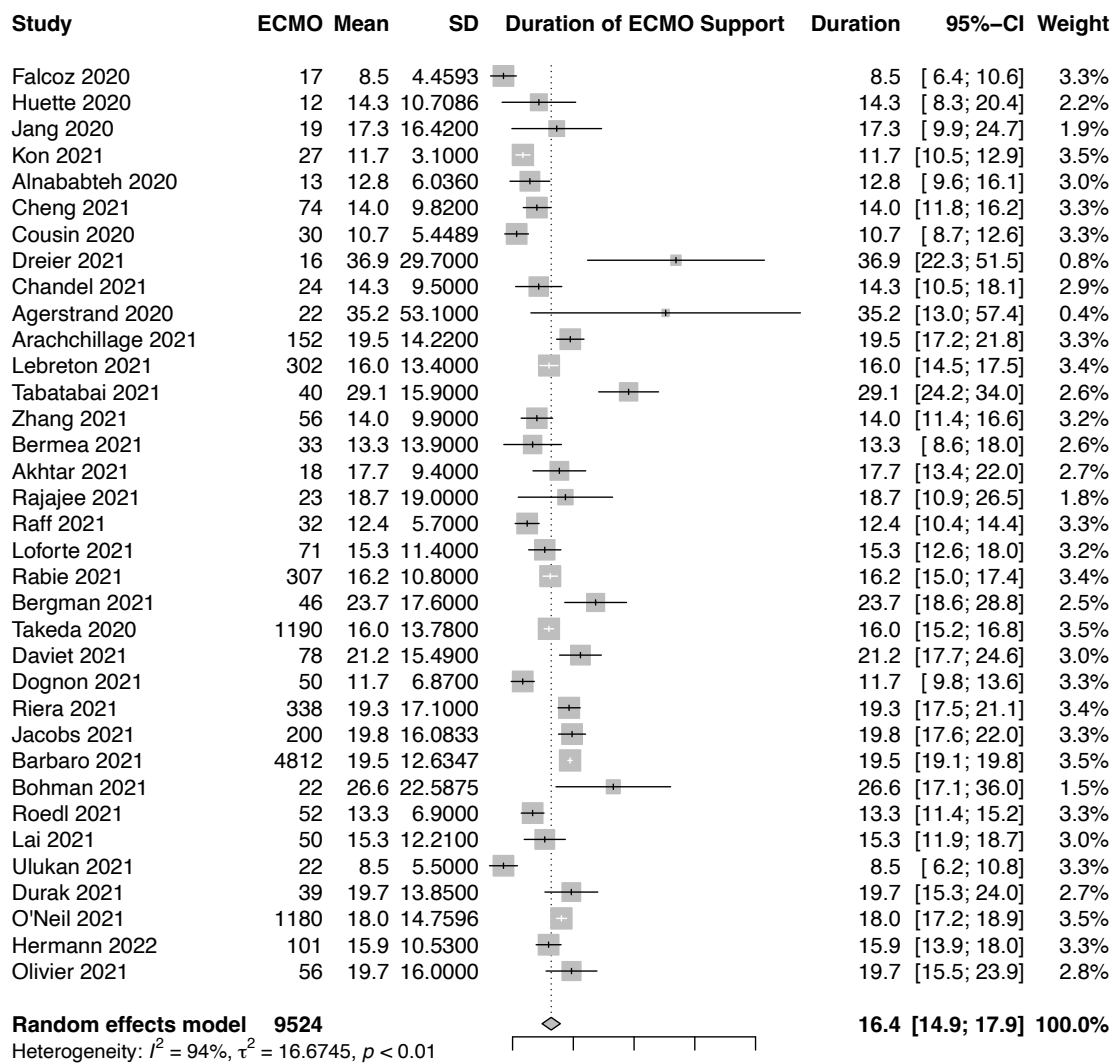

**Figure S4.** Pooled intensive care unit length of stay amongst patients receiving extracorporeal membrane oxygenation for coronavirus disease 2019

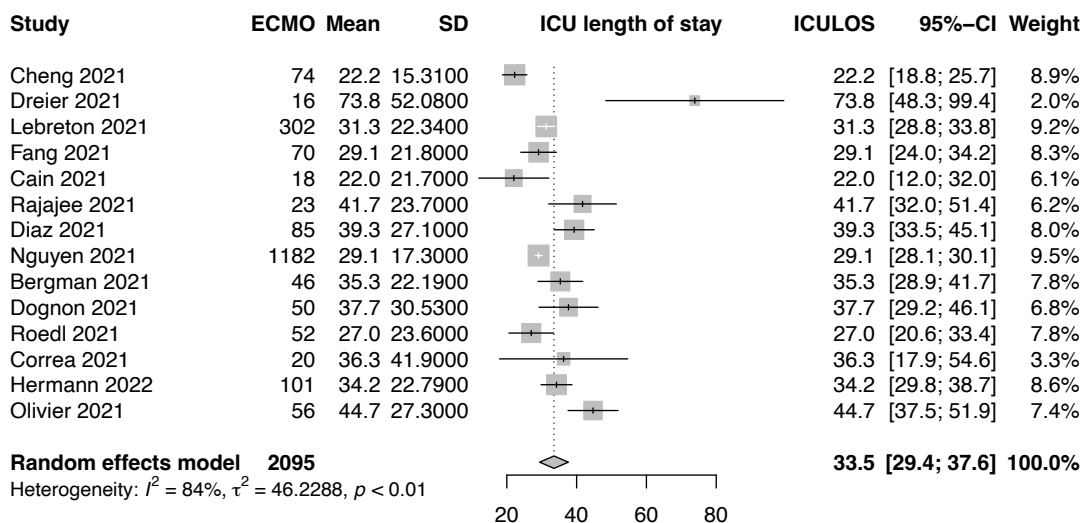

**Figure S5.** Pooled hospital length of stay among patients receiving extracorporeal membrane oxygenation for coronavirus disease 2019

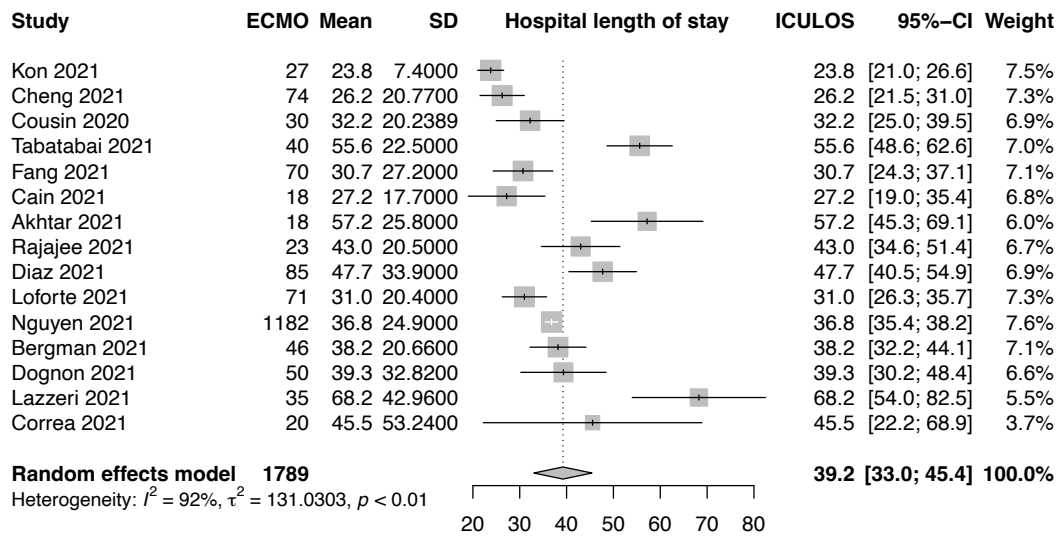

**Figure S6.** Association between time of last patient enrolment since 1 January 2020 (per 100 days) with duration of extracorporeal membrane oxygenation support, intensive care unit length of stay, and hospital length of stay.

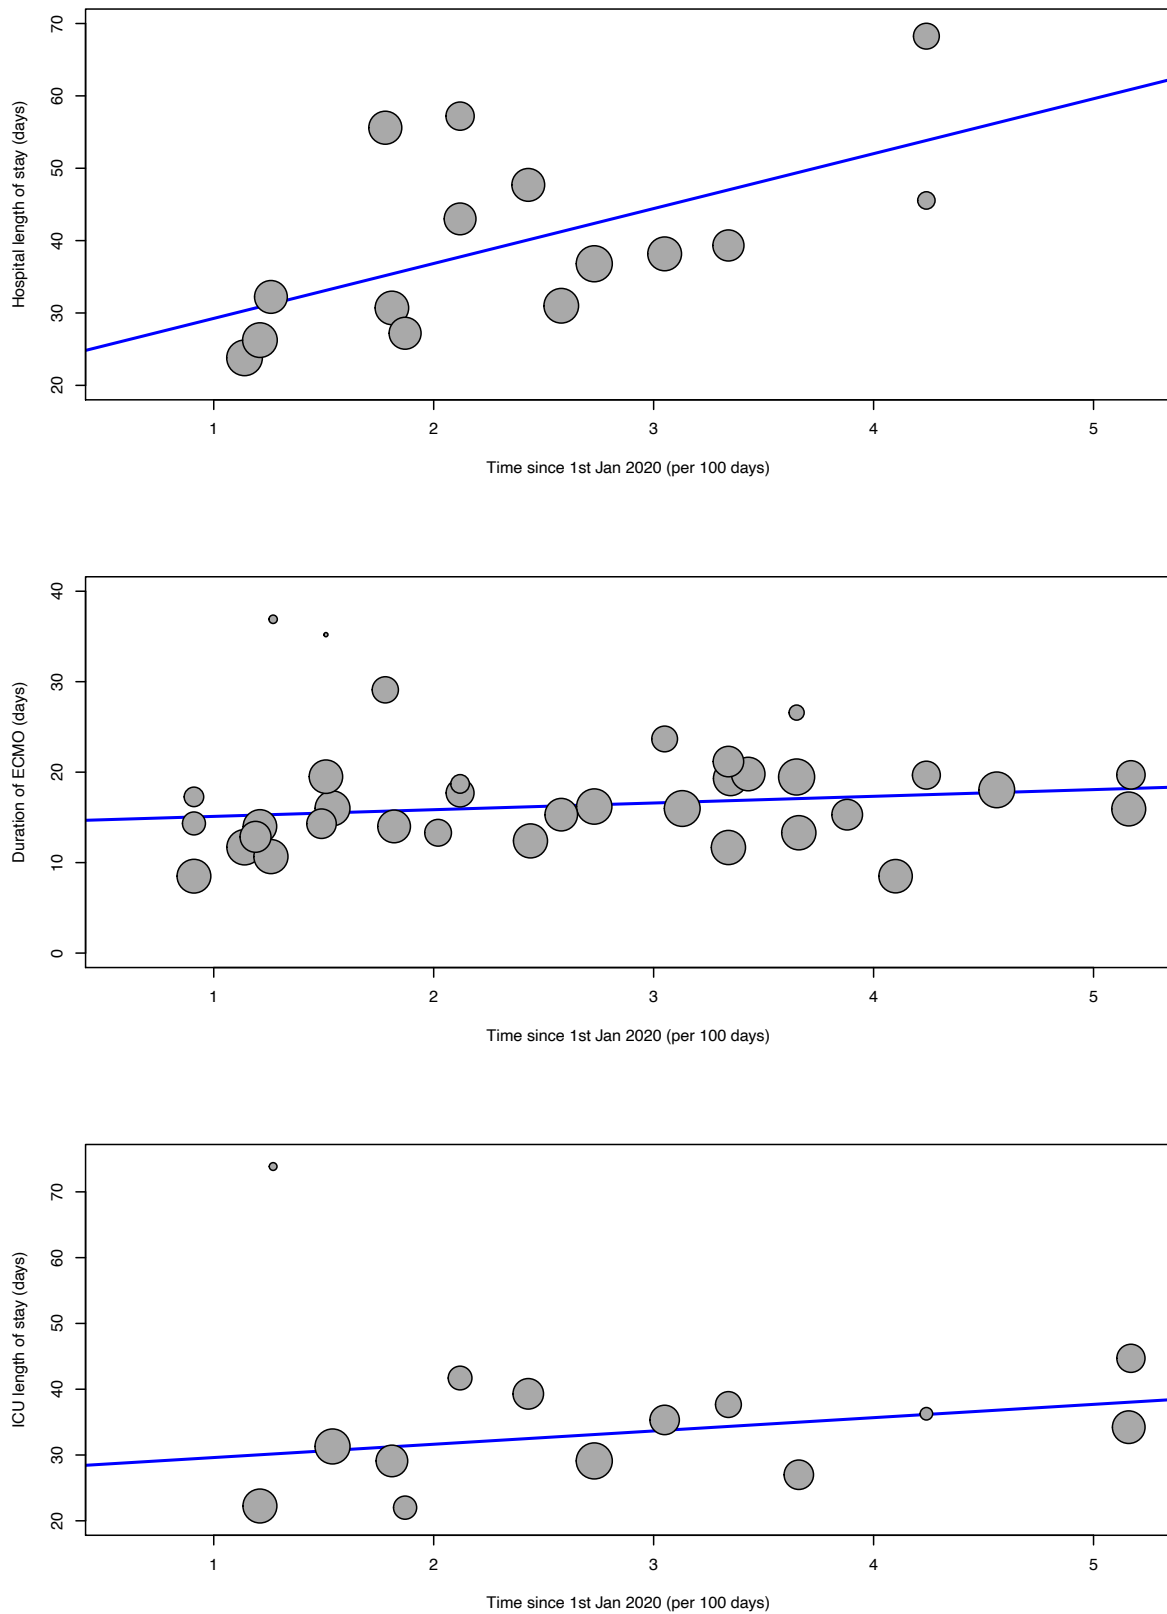

**Figure S7.** Association between average time patient enrolment since 1 January 2020 (per 100 days, defined as midpoint between date of first and last patient enrolment) and mortality.

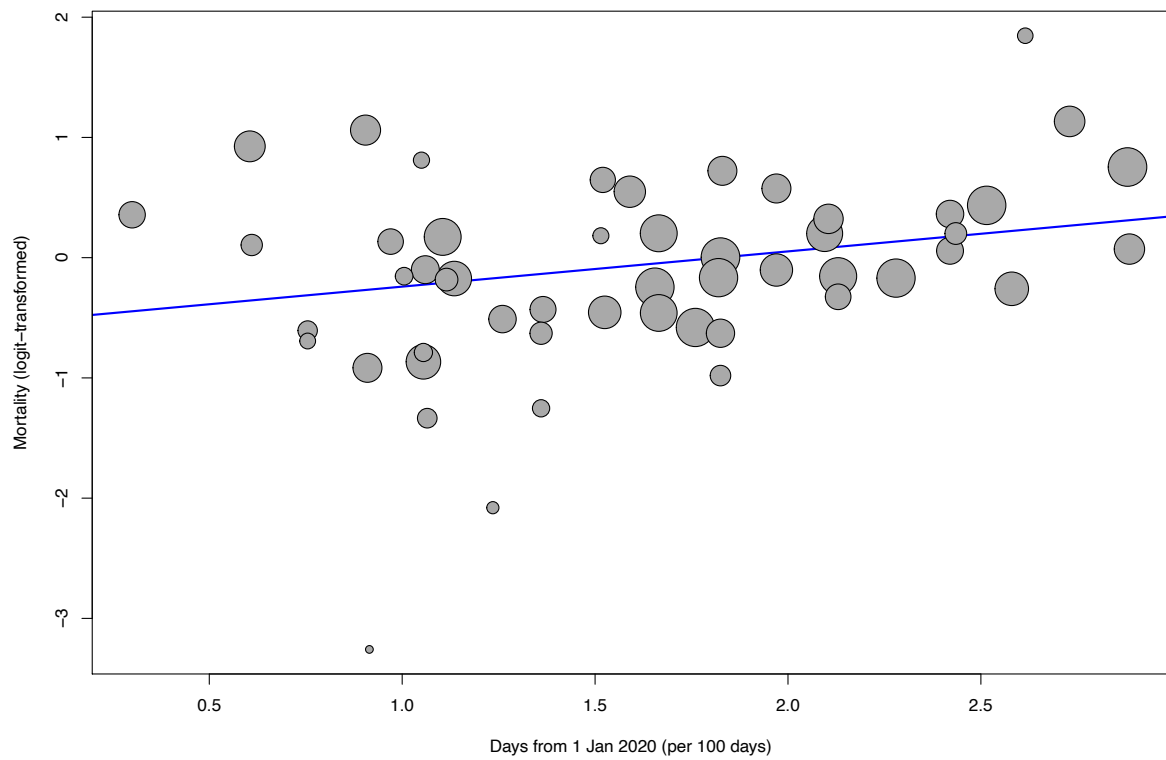



**Figure S8.** Post-hoc subgroup analysis of mortality for patients receiving extracorporeal membrane oxygenation for coronavirus disease 2019, stratified by duration of follow up.

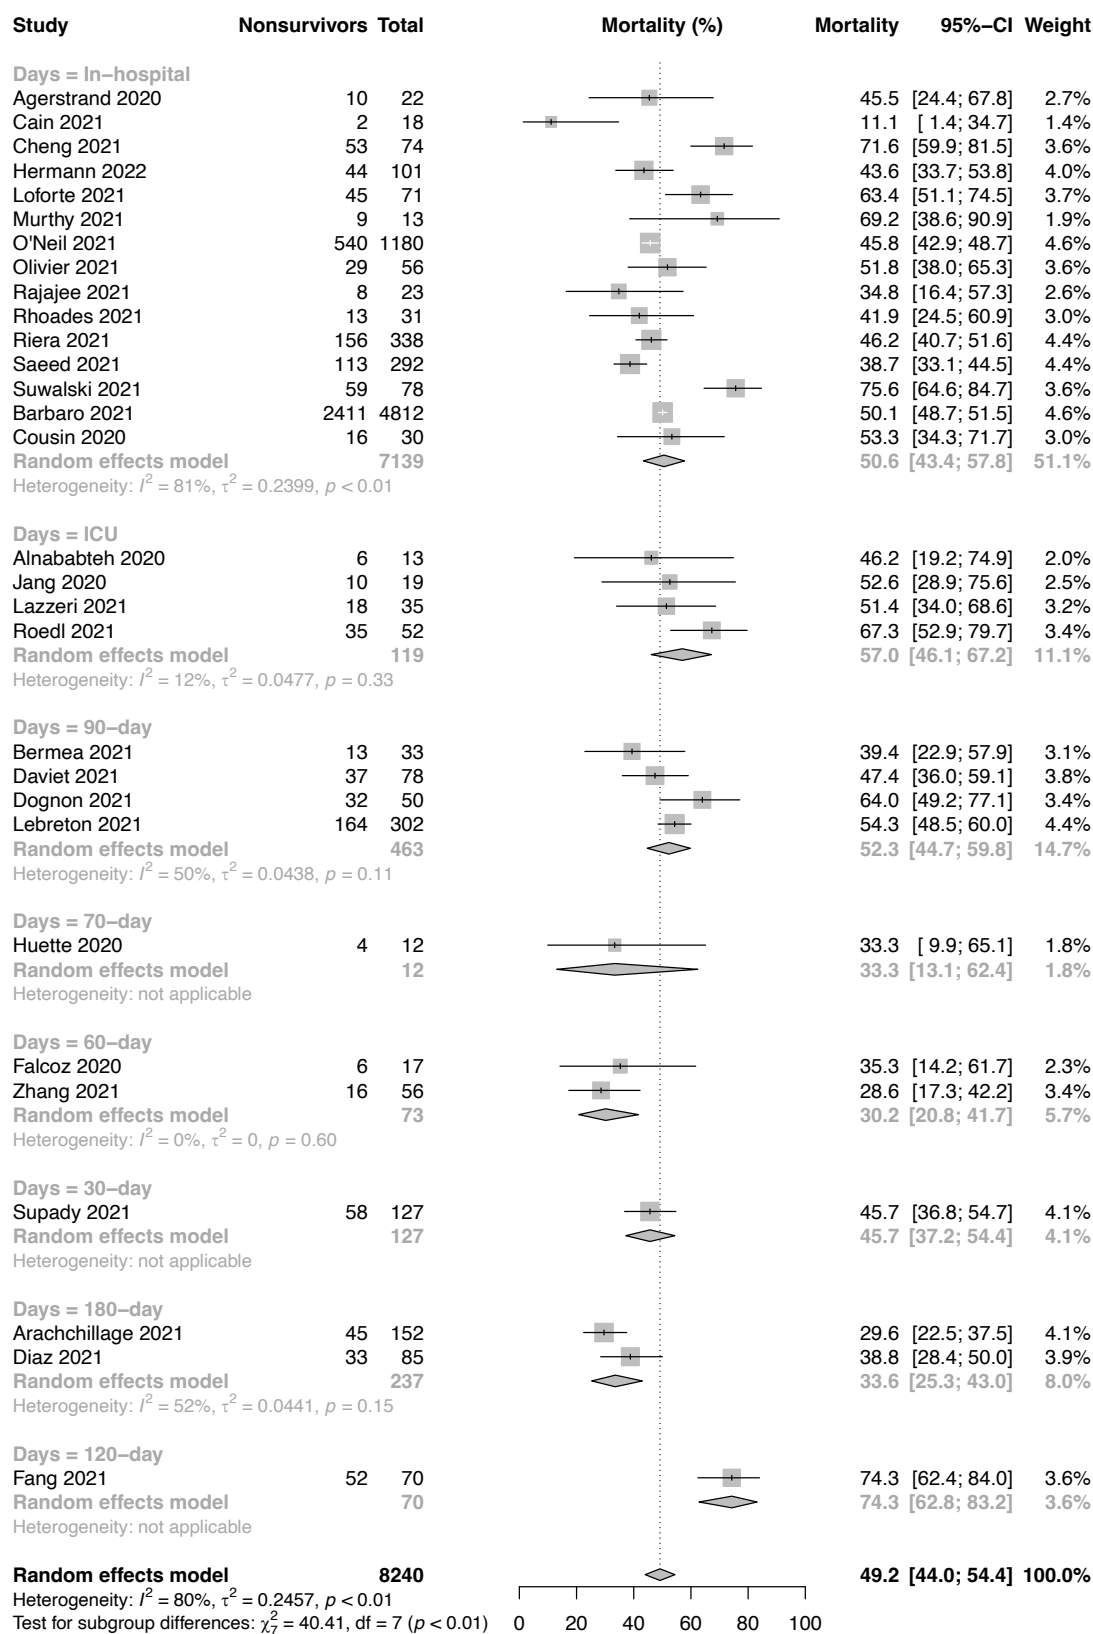

**Table S1.** Preferred Reporting Items for Systematic reviews and Meta-Analyses (PRISMA) 2020 Checklist

| Section and Topic             | Item # | Checklist item                                                                                                                                                                                                                                                                                       | Location where item is reported |
|-------------------------------|--------|------------------------------------------------------------------------------------------------------------------------------------------------------------------------------------------------------------------------------------------------------------------------------------------------------|---------------------------------|
| <b>TITLE</b>                  |        |                                                                                                                                                                                                                                                                                                      |                                 |
| Title                         | 1      | Identify the report as a systematic review.                                                                                                                                                                                                                                                          | 1                               |
| <b>ABSTRACT</b>               |        |                                                                                                                                                                                                                                                                                                      |                                 |
| Abstract                      | 2      | See the PRISMA 2020 for Abstracts checklist.                                                                                                                                                                                                                                                         | 3                               |
| <b>INTRODUCTION</b>           |        |                                                                                                                                                                                                                                                                                                      |                                 |
| Rationale                     | 3      | Describe the rationale for the review in the context of existing knowledge.                                                                                                                                                                                                                          | 5                               |
| Objectives                    | 4      | Provide an explicit statement of the objective(s) or question(s) the review addresses.                                                                                                                                                                                                               | 5                               |
| <b>METHODS</b>                |        |                                                                                                                                                                                                                                                                                                      |                                 |
| Eligibility criteria          | 5      | Specify the inclusion and exclusion criteria for the review and how studies were grouped for the syntheses.                                                                                                                                                                                          | 6                               |
| Information sources           | 6      | Specify all databases, registers, websites, organisations, reference lists and other sources searched or consulted to identify studies. Specify the date when each source was last searched or consulted.                                                                                            | 5                               |
| Search strategy               | 7      | Present the full search strategies for all databases, registers and websites, including any filters and limits used.                                                                                                                                                                                 | Table S2                        |
| Selection process             | 8      | Specify the methods used to decide whether a study met the inclusion criteria of the review, including how many reviewers screened each record and each report retrieved, whether they worked independently, and if applicable, details of automation tools used in the process.                     | 5-6                             |
| Data collection process       | 9      | Specify the methods used to collect data from reports, including how many reviewers collected data from each report, whether they worked independently, any processes for obtaining or confirming data from study investigators, and if applicable, details of automation tools used in the process. | 6                               |
| Data items                    | 10a    | List and define all outcomes for which data were sought. Specify whether all results that were compatible with each outcome domain in each study were sought (e.g. for all measures, time points, analyses), and if not, the methods used to decide which results to collect.                        | Table S3                        |
|                               | 10b    | List and define all other variables for which data were sought (e.g. participant and intervention characteristics, funding sources). Describe any assumptions made about any missing or unclear information.                                                                                         | Table S3                        |
| Study risk of bias assessment | 11     | Specify the methods used to assess risk of bias in the included studies, including details of the tool(s) used, how many reviewers assessed each study and whether they worked independently, and if applicable, details of automation tools used in the process.                                    | 6, Table S5                     |
| Effect measures               | 12     | Specify for each outcome the effect measure(s) (e.g. risk ratio, mean difference) used in the synthesis or presentation of results.                                                                                                                                                                  | 6                               |

|                               |     |                                                                                                                                                                                                                                                                                      |               |
|-------------------------------|-----|--------------------------------------------------------------------------------------------------------------------------------------------------------------------------------------------------------------------------------------------------------------------------------------|---------------|
| Synthesis methods             | 13a | Describe the processes used to decide which studies were eligible for each synthesis (e.g. tabulating the study intervention characteristics and comparing against the planned groups for each synthesis (item #5)).                                                                 | 5-6           |
|                               | 13b | Describe any methods required to prepare the data for presentation or synthesis, such as handling of missing summary statistics, or data conversions.                                                                                                                                | 6-7           |
|                               | 13c | Describe any methods used to tabulate or visually display results of individual studies and syntheses.                                                                                                                                                                               | 7-8, Table S4 |
|                               | 13d | Describe any methods used to synthesize results and provide a rationale for the choice(s). If meta-analysis was performed, describe the model(s), method(s) to identify the presence and extent of statistical heterogeneity, and software package(s) used.                          | 6-7           |
|                               | 13e | Describe any methods used to explore possible causes of heterogeneity among study results (e.g. subgroup analysis, meta-regression).                                                                                                                                                 | 7             |
|                               | 13f | Describe any sensitivity analyses conducted to assess robustness of the synthesized results.                                                                                                                                                                                         | 6-7           |
| Reporting bias assessment     | 14  | Describe any methods used to assess risk of bias due to missing results in a synthesis (arising from reporting biases).                                                                                                                                                              | Table S5      |
| Certainty assessment          | 15  | Describe any methods used to assess certainty (or confidence) in the body of evidence for an outcome.                                                                                                                                                                                | Table S6      |
| <b>RESULTS</b>                |     |                                                                                                                                                                                                                                                                                      |               |
| Study selection               | 16a | Describe the results of the search and selection process, from the number of records identified in the search to the number of studies included in the review, ideally using a flow diagram.                                                                                         | 8, Figure 1   |
|                               | 16b | Cite studies that might appear to meet the inclusion criteria, but which were excluded, and explain why they were excluded.                                                                                                                                                          | 8             |
| Study characteristics         | 17  | Cite each included study and present its characteristics.                                                                                                                                                                                                                            | 8, Table S4   |
| Risk of bias in studies       | 18  | Present assessments of risk of bias for each included study.                                                                                                                                                                                                                         | Table S5      |
| Results of individual studies | 19  | For all outcomes, present, for each study: (a) summary statistics for each group (where appropriate) and (b) an effect estimate and its precision (e.g. confidence/credible interval), ideally using structured tables or plots.                                                     | 8-10          |
| Results of syntheses          | 20a | For each synthesis, briefly summarise the characteristics and risk of bias among contributing studies.                                                                                                                                                                               | Table S6      |
|                               | 20b | Present results of all statistical syntheses conducted. If meta-analysis was done, present for each the summary estimate and its precision (e.g. confidence/credible interval) and measures of statistical heterogeneity. If comparing groups, describe the direction of the effect. | 8-10          |
|                               | 20c | Present results of all investigations of possible causes of heterogeneity among study results.                                                                                                                                                                                       | 8-10          |
|                               | 20d | Present results of all sensitivity analyses conducted to assess the robustness of the synthesized results.                                                                                                                                                                           | 8-10          |

|                                                |     |                                                                                                                                                                                                                                            |              |
|------------------------------------------------|-----|--------------------------------------------------------------------------------------------------------------------------------------------------------------------------------------------------------------------------------------------|--------------|
| Reporting biases                               | 21  | Present assessments of risk of bias due to missing results (arising from reporting biases) for each synthesis assessed.                                                                                                                    | Table S6     |
| Certainty of evidence                          | 22  | Present assessments of certainty (or confidence) in the body of evidence for each outcome assessed.                                                                                                                                        | Table S6     |
| <b>DISCUSSION</b>                              |     |                                                                                                                                                                                                                                            |              |
| Discussion                                     | 23a | Provide a general interpretation of the results in the context of other evidence.                                                                                                                                                          | 10-12        |
|                                                | 23b | Discuss any limitations of the evidence included in the review.                                                                                                                                                                            | 11-12        |
|                                                | 23c | Discuss any limitations of the review processes used.                                                                                                                                                                                      | 11-12        |
|                                                | 23d | Discuss implications of the results for practice, policy, and future research.                                                                                                                                                             | 11-12        |
| <b>OTHER INFORMATION</b>                       |     |                                                                                                                                                                                                                                            |              |
| Registration and protocol                      | 24a | Provide registration information for the review, including register name and registration number, or state that the review was not registered.                                                                                             | 5            |
|                                                | 24b | Indicate where the review protocol can be accessed, or state that a protocol was not prepared.                                                                                                                                             | 7            |
|                                                | 24c | Describe and explain any amendments to information provided at registration or in the protocol.                                                                                                                                            | 5            |
| Support                                        | 25  | Describe sources of financial or non-financial support for the review, and the role of the funders or sponsors in the review.                                                                                                              | 7            |
| Competing interests                            | 26  | Declare any competing interests of review authors.                                                                                                                                                                                         | 12           |
| Availability of data, code and other materials | 27  | Report which of the following are publicly available and where they can be found: template data collection forms; data extracted from included studies; data used for all analyses; analytic code; any other materials used in the review. | Table S3, 12 |

From: Page MJ, McKenzie JE, Bossuyt PM, Boutron I, Hoffmann TC, Mulrow CD, et al. The PRISMA 2020 statement: an updated guideline for reporting systematic reviews. *BMJ* 2021;372:n71. doi: 10.1136/bmj.n71

**Table S2.** Search strategy for databases

MedLine

| No. | Search                                                                                                                                                                                                                                                                                                                                                                                                                                                                                                                                                                                                                                                                                                                                                                                                                                                                                                                                                                                                                                                                                                                                                                              | Results |
|-----|-------------------------------------------------------------------------------------------------------------------------------------------------------------------------------------------------------------------------------------------------------------------------------------------------------------------------------------------------------------------------------------------------------------------------------------------------------------------------------------------------------------------------------------------------------------------------------------------------------------------------------------------------------------------------------------------------------------------------------------------------------------------------------------------------------------------------------------------------------------------------------------------------------------------------------------------------------------------------------------------------------------------------------------------------------------------------------------------------------------------------------------------------------------------------------------|---------|
| 1   | Extracorporeal Membrane Oxygenation[MeSH] OR Extracorporeal Membrane Oxygenation[Title/Abstract] OR Extracorporeal Membrane Oxygenat*[Title/Abstract] OR Extracorporeal Life Support[Title/Abstract] OR ECMO[Title/Abstract] OR ECLS[Title/Abstract] OR Extracorporeal Circulat*[Title/Abstract] OR Extracorporeal[Title/Abstract]                                                                                                                                                                                                                                                                                                                                                                                                                                                                                                                                                                                                                                                                                                                                                                                                                                                  | 48,567  |
| 2   | "SARS-CoV-2"[Mesh] OR "COVID-19"[Mesh] OR "Coronavirus Infections"[MeSH Terms] OR 2019-nCoV[Title/Abstract] OR 2019 ncov[Title/Abstract] OR nCov[Title/Abstract] OR covid-19[Title/Abstract] OR covid19[Title/Abstract] OR COVID-2019[Title/Abstract] OR COVID2019[Title/Abstract] OR sars-cov-2[Title/Abstract] OR "sars cov-2"[Title/Abstract] OR sarscov2[Title/Abstract] OR sarscov-2[Title/Abstract] OR sars-coronavirus-2[Title/Abstract] OR sars corona virus[Title/Abstract] OR sars-like coronavirus[Title/Abstract] OR novel coronavirus[Title/Abstract] OR novel corona virus[Title/Abstract] OR covid*[Title/Abstract] OR coronavirus 2[Title/Abstract] OR coronavirus infection*[Title/Abstract] OR coronavirus disease[Title/Abstract] OR corona virus disease[Title/Abstract] OR new coronavirus[Title/Abstract] OR new corona virus[Title/Abstract] OR new coronaviruses[Title/Abstract] OR novel coronaviruses[Title/Abstract] OR severe acute respiratory syndrome coronavirus-2[Title/Abstract] OR ((coronavirus[Title/Abstract] OR ncov[Title/Abstract] OR sars-cov[Title/Abstract]) AND (2019[Title/Abstract] OR 19[Title/Abstract] OR Wuhan[Title/Abstract])) | 230,658 |
| 3   | #1 AND #2                                                                                                                                                                                                                                                                                                                                                                                                                                                                                                                                                                                                                                                                                                                                                                                                                                                                                                                                                                                                                                                                                                                                                                           | 1,413   |

Embase

| No. | Search                                                                                                                                                                                                                                                                                                                                                                                                                                                                                                                                                                                                                                                                                                                                                                                                                                                                                                                                                    | Results |
|-----|-----------------------------------------------------------------------------------------------------------------------------------------------------------------------------------------------------------------------------------------------------------------------------------------------------------------------------------------------------------------------------------------------------------------------------------------------------------------------------------------------------------------------------------------------------------------------------------------------------------------------------------------------------------------------------------------------------------------------------------------------------------------------------------------------------------------------------------------------------------------------------------------------------------------------------------------------------------|---------|
| 1   | 'Extracorporeal oxygenation'/exp OR 'extracorporeal membrane oxygenation':ti,ab OR 'extracorporeal membrane oxygenat*':ti,ab OR 'extracorporeal life support':ti,ab OR 'ECMO':ti,ab OR 'ECLS':ti,ab OR 'extracorporeal circulat*':ti,ab OR extracorporeal:ti,ab                                                                                                                                                                                                                                                                                                                                                                                                                                                                                                                                                                                                                                                                                           | 78,672  |
| 2   | 'covid 19'/exp OR 'coronavirus disease 2019'/exp OR 'coronavirus infection'/exp OR 'severe acute respiratory syndrome coronavirus 2'/exp OR '2019-ncov':ti,ab OR '2019 ncov':ti,ab OR ncov:ti,ab OR 'covid-19':ti,ab OR 'covid-2019':ti,ab OR 'covid2019':ti,ab OR covid19:ti,ab OR 'sars-cov-2':ti,ab OR 'sars cov-2':ti,ab OR sarscov2:ti,ab OR 'sarscov-2':ti,ab OR 'sars-coronavirus-2':ti,ab OR 'sars corona virus':ti,ab OR 'sars-like coronavirus':ti,ab OR 'novel coronavirus':ti,ab OR 'novel corona virus':ti,ab OR covid*:ti,ab OR 'coronavirus 2':ti,ab OR 'coronavirus infection*':ti,ab OR 'coronavirus disease':ti,ab OR 'corona virus disease':ti,ab OR 'new coronavirus':ti,ab OR 'new corona virus':ti,ab OR 'new coronaviruses':ti,ab OR 'novel coronaviruses':ti,ab OR 'severe acute respiratory syndrome coronavirus-2':ti,ab OR ((coronavirus:ti,ab OR ncov:ti,ab OR 'sars cov':ti,ab) AND (2019:ti,ab OR 19:ti,ab OR wuhan:ti,ab)) | 251,285 |
| 3   | #1 AND #2                                                                                                                                                                                                                                                                                                                                                                                                                                                                                                                                                                                                                                                                                                                                                                                                                                                                                                                                                 | 3,432   |

Cochrane

| No. | Search                                                                   | Results |
|-----|--------------------------------------------------------------------------|---------|
| 1   | MeSH descriptor: [Extracorporeal Membrane Oxygenation] explode all trees | 193     |

|   |                                                                                                                                                                                                                                                                                                                                                                                                                                                                                                           |       |
|---|-----------------------------------------------------------------------------------------------------------------------------------------------------------------------------------------------------------------------------------------------------------------------------------------------------------------------------------------------------------------------------------------------------------------------------------------------------------------------------------------------------------|-------|
| 2 | (Extracorporeal Membrane Oxygenation OR Extracorporeal Membrane Oxygenat* OR Extracorporeal Life Support OR ECMO OR ECLS OR Extracorporeal Circulat* OR Extracorporeal):ti,ab                                                                                                                                                                                                                                                                                                                             | 4,763 |
| 3 | ((covid-19 or covid19 or nCov or sars-cov-2 or sarscov2 or sarscov-2 or sars-coronavirus-2 or sars corona virus or sars-like coronavirus or novel coronavirus or novel corona virus or covid* or coronavirus 2 or coronavirus infection* or coronavirus disease or corona virus disease or new coronavirus or new corona virus or new coronaviruses or novel coronaviruses or severe acute respiratory syndrome coronavirus-2) OR ((coronavirus OR ncov OR sars-cov) NEAR/5 (2019 OR 19 OR Wuhan))):ti,ab | 9,488 |
| 4 | (#1 OR #2) AND #3                                                                                                                                                                                                                                                                                                                                                                                                                                                                                         | 258   |

Scopus

| No. | Search                                                                                                                                                                                                                                                                                                                                                                                                                                                                                                                                    | Results |
|-----|-------------------------------------------------------------------------------------------------------------------------------------------------------------------------------------------------------------------------------------------------------------------------------------------------------------------------------------------------------------------------------------------------------------------------------------------------------------------------------------------------------------------------------------------|---------|
| 1   | TITLE-ABS-KEY("Extracorporeal Membrane Oxygenation" OR "Extracorporeal Membrane Oxygenat*" OR "Extracorporeal Life Support" OR "ECMO" OR "ECLS" OR "Extracorporeal Circulat*" OR "Extracorporeal")                                                                                                                                                                                                                                                                                                                                        | 81,691  |
| 2   | TITLE-ABS-KEY(((covid-19 or covid19 or nCov or sars-cov-2 or sarscov2 or sarscov-2 or sars-coronavirus-2 or "sars corona virus" or "sars-like coronavirus" or "novel coronavirus" or "novel corona virus" or covid* or "coronavirus 2" or "coronavirus infection*" or "coronavirus disease" or "corona virus disease" or "new coronavirus" or "new corona virus" or "new coronaviruses" or "novel coronaviruses" or "severe acute respiratory syndrome coronavirus-2") OR ((coronavirus OR ncov OR sars-cov) W/5 (2019 OR 19 OR Wuhan)))) | 288,721 |
| 4   | #1 AND #2                                                                                                                                                                                                                                                                                                                                                                                                                                                                                                                                 | 2,713   |

**Table S3.** Data collection template

**Study characteristics:** Title, authors, year published, journal, country, hospital, duration of study, inclusion/exclusion criteria

**Baseline demographics:** Sample size, age, number of male patients, body mass index, comorbidities (hypertension, diabetes mellitus type 2, dyslipidaemia, obesity, chronic obstructive pulmonary disease/asthma, coronary artery disease, smoking, other comorbidities)

**Pre-ECMO characteristics:** Sequential organ failure assessment score, simplified acute physiology score, acute physiology and chronic health evaluation score, lung injury score, PaO<sub>2</sub>-to-FiO<sub>2</sub> ratio, PaO<sub>2</sub>, PaCO<sub>2</sub>, pH, lactate, left ventricular ejection fraction, cardiac arrest, requirement of pre-ECMO renal replacement therapy, D-dimer, fibrinogen, interleukin-6 levels, white blood cell/leukocyte count, time from symptoms to initiation of invasive mechanical ventilation, time from noninvasive ventilation to invasive mechanical ventilation

**ECMO characteristics:** Indications for ECMO, number of patients receiving venovenous, venoarterial, veno-veno-arterial and veno-arterio-venous, and other types of ECMO, cannulation site, adjuvant therapies including but not limited to: prone positioning, vasodilators, high frequency oscillatory ventilation, paralytics, vasopressors/inotropes, inhaled nitric oxide, steroids, hydroxychloroquine, interleukin antagonists, lopinavir-ritonavir, remdesivir, and other therapies, time from invasive mechanical ventilation to ECMO cannulation.

**Ventilatory characteristics:** Tidal volume, fraction of inspired oxygen (FiO<sub>2</sub>), peak inspiratory pressure, plateau pressure, driving pressure, mean airway pressure, respiratory rate, positive end-expiratory pressure, respiratory system compliance

**Outcomes:**

Mortality, time to follow-up, survival to discharge, duration of ECMO support, duration of invasive mechanical ventilation, length of hospital and intensive care unit stay, complications while on ECMO (grouped into mechanical, haemorrhagic, neurologic, renal, cardiovascular, pulmonary, infectious, metabolic, limb, thrombotic, and others).

**Table S4a.** Demographics and outcomes of included studies

| Author             | Country              | Sample size | VV-ECMO | Demographics of ECMO patients |                  |                 | Nonsurvivors | Duration of ECMO (days) | Length of ICU stay | Length of hospital stay (days) |
|--------------------|----------------------|-------------|---------|-------------------------------|------------------|-----------------|--------------|-------------------------|--------------------|--------------------------------|
|                    |                      |             |         | Male                          | BMI              | Age (yrs)       |              |                         |                    |                                |
| Agerstrand 2020    | USA                  | 22          | 15      | 18                            |                  | 52 (19-68)      | 10           | 24.5 (7-74)             |                    |                                |
| Akhtar 2021        | UK                   | 18          | 16      | 16                            | 31 ± 6.6         | 47.3 ± 0.9      | 4            | 17.7 ± 9.4              |                    | 57.2 ± 25.8                    |
| Alnababteh 2020    | USA                  | 13          | 13      | 8                             | 33.39 ± 9.519    | 58.3 ± 14.54    | 6            | 12.85 ± 6.04            |                    |                                |
| Arachchillage 2021 | UK                   | 152         | 152     | 114                           |                  | 47 [23-65]      | 45           | 17.5 (11-30)            |                    |                                |
| Barbaro 2021       | International (ELSO) | 4812        | 4492    | 3523                          | 32.28 ± 7.14     | 49.95 ± 11.97   | 2411         | 19.46 ± 12.63*          |                    |                                |
| Bergman 2021       | USA                  | 46          | 46      | 38                            | 31.7 ± 6.6       | 51.3 ± 10       | 16           | 22 (13-36)              | 33 (22-51)         | 39.5 (29-56)                   |
| Bermea 2021        | USA                  | 33          | 33      | 24                            | 33 (30-35)       | 53 (42-59)      | 13           | 12 (5-23)               |                    |                                |
| Bohman 2021        | USA                  | 22          | 22      | 16                            | 31.2 (29.1-37.9) | 50.5 (43-56.3)  | 6            | 25.75 (12.75-41.25)     |                    |                                |
| Broman 2021        | International (ELSO) | 1723        |         |                               |                  |                 | 1046         |                         |                    |                                |
| Cain 2021          | USA                  | 18          | 18      | 10                            |                  | 51 (44-57)      | 2            |                         | 21 (9-36)          | 25.5 (17-39)                   |
| Chandel 2021       | USA                  | 24          | 24      | 20                            |                  | 46 (37-53)      | 5            | 13 (9-21)               |                    |                                |
| Cheng 2021         | China                | 74          |         | 46                            |                  | 63 (55-71)      | 53           | 13 (8-21)               | 18 (10-30.5)       | 27 (12-39.75)                  |
| Correa 2021        | Brazil               | 1296        | 20      |                               |                  |                 | 11           |                         | 36.27 ± 41.9*      | 45.55 ± 53.24*                 |
| Cousin 2020        | France               | 30          | 30      | 24                            | 33.33 ± 7.006    | 55.333 ± 11.676 | 16           | 10.667 ± 5.4489         |                    | 32.22 ± 20.2389                |
| Daviet 2021        | France               | 78          | 77      | 59                            | 28.1 (26.1-31.8) | 61 (54-64.5)    | 37           | 21 (11-31.5)            |                    |                                |
| Diaz 2021          | Chile                | 85          | 82      | 71                            |                  | 48 (41-55)      | 33           |                         | 40 (21-57)         | 50 (24-69)                     |
| Dognon 2021        | France               | 50          | 50      | 46                            | 31 (28-36)       | 61 (53-66)      | 32           | 12 (7-16)               | 33 (20-60)         | 33 (21-64)                     |



|                    |                      |      |      |      |                  |                |      |                 |               |                    |
|--------------------|----------------------|------|------|------|------------------|----------------|------|-----------------|---------------|--------------------|
| Dreier 2021        | Germany              | 16   | 16   | 13   | 27.5 (24.7-32.6) | 59 (51-65)     | 5    | 36.9 ± 29.7     | 73.85 ± 52.08 |                    |
| Durak 2021         | Germany              | 39   | 38   | 28   | 29.7 (26.3-35.2) | 56 (50-60)     | 23   | 19 (11-29)      |               |                    |
| Falcoz 2020        | France               | 17   | 16   | 16   |                  | 56 [30-76]     | 6    | 9 [0-16]        |               |                    |
| Fang 2021          | China                | 70   | 70   | 42   |                  |                | 52   |                 | 28 (15.25-44) | 23.5 (16.25-52.25) |
| Hermann 2022       | Austria              | 101  | 101  | 71   | 31 ± 6           | 56 ± 10        | 44   | 16.4 (8.7-22.7) | 31 (20.7-51)  |                    |
| Huette 2020        | France               | 12   | 12   | 12   | 29.4 (29.2-32.6) | 62 (58-64)     | 4    | 12 (9-22)       |               |                    |
| Jacobs 2021        | USA                  | 200  | 188  | 138  |                  | 49.8 ± 12.1    | 110  | 19.79 ± 16.08   |               |                    |
| Jang 2020          | Korea                | 19   | 16   | 15   | 26.7 (25.6-27.8) | 63 (60-66)     | 10   | 15.9 (7.7-28.2) |               |                    |
| Jozwiak 2020       | France               | 11   | 11   | 7    | 30 (26-32)       | 50 (38-59)     | 6    |                 |               |                    |
| Karagiannidis 2021 | Germany              | 3397 | 3397 |      |                  | 57 ± 11        | 2310 |                 |               |                    |
| Kon 2021           | USA                  | 27   | 27   | 23   | 32 (29-37)       | 40 (30.5-47)   | 1    | 11 (10-14)      |               | 23 (19.5-29)       |
| Lai 2021           | China                | 50   | 47   | 34   | 25.3 (23.1-27.8) | 65.3 (58.5-73) | 29   | 17.9 (6-22)     |               |                    |
| Lazzeri 2021       | Italy                | 35   | 35   | 28   | 34 ± 6           | 54 ± 11        | 18   |                 |               | 42 [4-185]         |
| Lebreton 2021      | France               | 302  | 288  | 235  | 29.7 (26.8-33.5) | 52 (45-58)     | 164  | 14 (8-26)       | 30 (17-47)    |                    |
| Li 2021            | China                | 34   | 31   | 22   |                  | 64.5 (56-72)   | 20   |                 |               |                    |
| Loforte 2021       | Italy                | 71   | 67   | 61   | 30.2 ± 6.1       | 55.4 ± 9.3     | 45   | 15 (8-23)       |               | 30 (18-45)         |
| Lorusso 2021       | International (ELSO) | 1531 | 1383 | 1209 |                  | 52.6 [16-80]   | 672  | 18              |               |                    |
| Murthy 2021        | Canada               | 13   | 13   |      |                  |                | 9    |                 |               |                    |
| Nguyen 2021        | USA                  | 1182 |      | 844  |                  |                | 542  |                 | 29.1 ± 17.3   | 36.8 ± 24.9        |
| O'Neil 2021        | International (ELSO) | 1180 | 1180 | 0    |                  | 49.05 ± 12.66  | 540  |                 |               |                    |
| Olivier 2021       | France               | 56   | 56   | 49   | 30 (27-34)       | 57 (51-65)     | 29   | 18 (10-31)      | 46 (28-60)    |                    |
| Rabie 2021         | International        | 307  | 288  | 248  | 28.6 (25.4-33.3) | 45 (37-52)     | 169  | 15 (9.5-24)     |               |                    |

|                |               |      |     |     |                  |                |     |                |            |             |
|----------------|---------------|------|-----|-----|------------------|----------------|-----|----------------|------------|-------------|
| Raff 2021      | USA           | 32   | 32  | 25  | 35.1 ± 7.8       | 47.8 ± 10.3    | 21  | 12.4 ± 5.7     |            |             |
| Rajajee 2021   | USA           | 23   | 20  | 5   | 33 (27-37)       | 47 (37-52)     | 8   | 16 (8-32)      | 47 (24-54) | 47 (28-54)  |
| Rhoades 2021   | USA           | 31   | 31  | 22  | 32 (21.5-47.6)   | 53 (32-66)     | 13  |                |            |             |
| Riera 2021     | International | 338  | 319 | 258 |                  | 53 ± 10        | 156 | 17 (9-32)      |            |             |
| Roedl 2021     | Germany       | 52   | 51  | 34  | 32.1 (26.3-36.7) | 58 (53-64)     | 35  | 17 (7-27)      | 24 (13-44) |             |
| Saeed 2021     | USA           | 292  | 280 | 211 | 32 (29-37)       | 49 (39-57)     | 113 |                |            |             |
| Shah 2021      | USA           | 40   | 40  | 33  | 34 (27-40)       | 43 (36-50)     | 19  |                |            |             |
| Supady 2021    | International | 127  | 127 | 100 | 29 (26-35)       | 59 (53-66)     | 58  |                |            |             |
| Suwalski 2021  | Poland        | 78   | 64  | 60  | 31.3 ± 9.5       | 47 ± 11.3      | 59  |                |            |             |
| Tabatabai 2021 | USA           | 40   | 40  | 32  | 34 ± 7.1         | 43.2 ± 8.9     | 15  | 29.1 ± 15.9    |            | 55.6 ± 22.5 |
| Takeda 2020    | Japan         | 1190 |     | 959 |                  |                | 427 | 15.98 ± 13.78* |            |             |
| Ulukan 2021    | Turkey        | 22   | 18  | 16  |                  | 56.3 ± 10.6    | 19  | 8.5 ± 5.5      |            |             |
| Zhang 2021     | UK            | 56   | 56  | 41  | 29.5 (27-34)     | 46 (37.5-52.5) | 16  | 13 (8-21)      |            |             |

Abbreviations: ELSO: Extracorporeal life support organisation, ECMO: extracorporeal membrane oxygenation, ICU: intensive care unit, VV: venovenous, USA: United States of America

Data presented as mean ± standard deviation, median (interquartile range), or median [range].

\*Values derived from combining subgroup data provided by the studies

**Table S4b.** Pre-ECMO ventilatory parameters

| Author Year     | Tidal volume           | Peak inspiratory pressure (cm H <sub>2</sub> O) | Plateau Pressure (cm H <sub>2</sub> O) | Driving pressure (cm H <sub>2</sub> O) | Mean airway pressure (cm H <sub>2</sub> O) | Respiratory rate | PEEP (cm H <sub>2</sub> O) | Compliance (ml/cm H <sub>2</sub> O) |
|-----------------|------------------------|-------------------------------------------------|----------------------------------------|----------------------------------------|--------------------------------------------|------------------|----------------------------|-------------------------------------|
| Agerstrand 2020 | 400 (200-600) ml       |                                                 | 36 (21-50)                             |                                        |                                            | 34 (18-38)       | 15 (10-20)                 |                                     |
| Barbaro 2021*   |                        | 33.9 ± 5.9                                      |                                        |                                        |                                            |                  | 13.4 ± 4.0                 |                                     |
| Bergman 2021    | 386 ± 70 ml            | 34.2 ± 50                                       | 30.0 ± 4.4                             |                                        |                                            | 25.9 ± 6.3       | 13.7 ± 2.8                 |                                     |
| Cheng 2021      | 5 (5-6) ml/kg          |                                                 | 34 (32-35)                             |                                        |                                            | 30 (28-32)       | 15 (12-16.5)               |                                     |
| Cousin 2020     | 6.5 (5.7-6.9) ml/kg    |                                                 | 30 (26-31)                             | 15 (13-20)                             |                                            | 30 (26-32)       | 14 (12-16)                 |                                     |
| Dognon 2021     | 260 (180-295) ml       |                                                 | 24 (20-26)                             | 12 (10-14)                             |                                            | 17 (13-20)       | 12 (10-14)                 | 21 (14-30)                          |
| Daviet 2021     | 5.8 (5.1-6.2) ml/kg    |                                                 | 28 (25-30)                             |                                        |                                            | 27 (23-30)       | 12 (9.5-14)                | 23 (16.7-28.6)                      |
| Diaz 2021       | 5.4 (4.7-6) ml/kg      |                                                 | 26.2 (5.2)                             | 15 (14-18)                             |                                            |                  | 10.4 (4.1)                 | 22 (18-28)                          |
| Dreier 2021     | 5.7 (4.3–6.3) ml/kg    | 34.0 (31.0–35.0)                                |                                        |                                        |                                            | 25 (23–25)       | 15.0 (13.3–15.8)           | 25.9 (19.4–29.0)                    |
| Durak 2021      |                        |                                                 |                                        |                                        |                                            |                  | 12 (10-14)                 |                                     |
| Falcoz 2020     | 3.9 ± 1.2 ml/kg        |                                                 | 27.75 ± 5.2954                         | 14.75 ± 4.1806                         |                                            | 19 ± 4.459       | 12 ± 2.3                   |                                     |
| Fang 2021       |                        |                                                 |                                        |                                        |                                            |                  |                            |                                     |
| Hermann 2022    | 6 ± 2 ml/kg            | 31 ± 5                                          | 31 ± 5                                 | 18 ± 5                                 |                                            | 22 ± 5           | 13 ± 3                     |                                     |
| Huette 2020     | 6.1 ± 0.2 ml/kg        |                                                 | 29 ± 1.6                               |                                        | 31 ± 1.647                                 | 14 ± 1.647       |                            |                                     |
| Kon 2021        |                        | 31 (28-35)                                      |                                        |                                        |                                            | 25 (22-28)       | 14 (12-16)                 |                                     |
| Lai 2021        | 4.9 (4.4-5.6) ml/kg    |                                                 | 30.5 (26.0-34)                         | 13.5 (13-14)                           |                                            | 10.3 (10-11)     | 8.8 (8-10)                 |                                     |
| Lazzeri 2021    | 350 (range 140-420) ml |                                                 |                                        |                                        |                                            |                  | 12 (range 8-16)            |                                     |
| Lebreton 2021   | 5.6 (4.9-6.2) ml/kg    |                                                 | 30 (27-32)                             | 18 (14-21)                             |                                            | 28 (26-30)       | 12 (10-14)                 |                                     |
| Li 2021         |                        |                                                 | 29.9 ± 9.1                             |                                        |                                            |                  | 11 ± 2.1                   |                                     |
| Loforte 2021    | 469.6 ± 114.4 ml       |                                                 |                                        |                                        |                                            |                  | 13.3 ± 4.1                 | 34.4 ± 18.1                         |
| O'Neil 2021*    |                        | 13.7 ± 3.6                                      |                                        | 21.36 ± 5.76                           | 22.06 ± 4.57                               |                  | 13.73 ± 3.64               |                                     |
| Ogura 2021      |                        |                                                 |                                        |                                        |                                            |                  | 12 (10–15)                 |                                     |
| Olivier 2021    | 5.9 (5.5–6.1) ml/kg    |                                                 | 31 (30–34)                             |                                        |                                            |                  | 10 (6–14)                  | 20 (15–23)                          |
| Rabie 2021      |                        | 36 (34-43)                                      | 32 (30-35)                             | 20 (17-23)                             |                                            |                  | 13 (10.5-15)               | 19.5 (15.2-22.8)                    |
| Raff 2021       |                        |                                                 |                                        |                                        |                                            |                  |                            |                                     |

|                |                  |            |                  |                  |            |                  |                  |            |
|----------------|------------------|------------|------------------|------------------|------------|------------------|------------------|------------|
| Rajajee 2021   |                  |            |                  |                  |            |                  | 18 (16–20)       | 22 (19–26) |
| Roedl 2021     | 287 (207–341) ml | 30 (25–34) |                  |                  |            |                  | 15 (12–16)       |            |
| Shah 2021      |                  | 38 (34-42) |                  |                  | 25 (23-27) |                  |                  |            |
| Supady 2021    |                  |            | 32.6 (26.5-35.7) | 17.3 (13.3-21.4) |            | 25.5 (21.4-30.6) | 14.3 (10.2-16.3) |            |
| Tabatabai 2021 |                  | 38 ± 7.5   |                  |                  | 25.1 ± 4.8 |                  | 15.6 ± 3.5       | 20.6 ± 7.7 |
| Zhang 2021     |                  |            | 30 (27.8-31.2)   |                  |            |                  |                  |            |

\* Values derived by combining subgroup data provided by studies

**Table S5.** Joanna Briggs Institute Checklist  
Case series

| Author             | Domain |   |   |   |   |   |   |   |    |    | Total score |    |
|--------------------|--------|---|---|---|---|---|---|---|----|----|-------------|----|
|                    | 1      | 2 | 3 | 4 | 5 | 6 | 7 | 8 | 9  | 10 |             |    |
| Agerstrand 2020    | ✓      | ✓ | ✓ | ✓ | ✓ | ✓ | ✓ | ✓ | ✓  | ✓  | ✓           | 10 |
| Akhtar 2021        | ✓      | ✓ | ✓ | ✓ | ✓ | ✓ | ✓ | ✓ | ✓  | ✓  | ✓           | 10 |
| Arachchillage 2021 | ✓      | ✓ | ✓ | ✓ | ✓ | ✓ | ✓ | ✓ | ✓  | ✓  | ✓           | 10 |
| Bergman 2021       | ✓      | ✓ | ✓ | ✓ | ✓ | ✓ | ✓ | ✓ | ✓  | ✓  | ✓           | 10 |
| Bermea 2021        | ✓      | X | X | X | X | ✓ | ✓ | ✓ | ✓  | ✓  | ✓           | 6  |
| Broman 2021        | ✓      | ✓ | ✓ | ? | ? | X | X | ✓ | NA | ✓  | ✓           | 5  |
| Cain 2021          | ✓      | ✓ | ✓ | ? | ? | ✓ | ✓ | ✓ | ✓  | ✓  | ✓           | 8  |
| Chandel 2021       | ✓      | ? | ? | ✓ | ✓ | ✓ | ✓ | ✓ | ✓  | ✓  | ✓           | 8  |
| Daviet 2021        | ✓      | ? | ? | ✓ | ✓ | ✓ | ✓ | ✓ | ✓  | ✓  | ✓           | 8  |
| Diaz 2021          | ✓      | ✓ | ✓ | ? | ? | ✓ | ✓ | ✓ | ✓  | X  | ✓           | 7  |
| Dognon 2021        | ✓      | ✓ | ✓ | ✓ | ✓ | ✓ | ✓ | ✓ | ✓  | ✓  | ✓           | 10 |
| Dreier 2021        | ✓      | ? | ? | ✓ | ✓ | ✓ | ✓ | ✓ | ✓  | ✓  | ✓           | 8  |
| Fang 2021          | ✓      | ✓ | ✓ | ✓ | X | ✓ | ✓ | ✓ | ✓  | ✓  | ✓           | 9  |
| Hermann 2022       | ✓      | ✓ | ? | ✓ | ✓ | ✓ | ✓ | ✓ | ✓  | ✓  | ✓           | 9  |
| Huette 2020        | ✓      | ✓ | ✓ | ✓ | ✓ | ✓ | ✓ | ✓ | ✓  | ✓  | ✓           | 10 |
| Jacobs 2021        | ✓      | ✓ | ✓ | ✓ | X | ✓ | ✓ | ✓ | ✓  | ✓  | ✓           | 9  |
| Jozwiak 2020       | ✓      | ✓ | ✓ | ✓ | ✓ | ✓ | ✓ | ✓ | ✓  | ✓  | ✓           | 10 |
| Karagiannidis 2021 | ✓      | ✓ | ✓ | ✓ | ✓ | X | X | ✓ | X  | ✓  | ✓           | 7  |
| Kon 2021           | ✓      | ✓ | ✓ | ✓ | ✓ | ✓ | ✓ | ✓ | NA | ✓  | ✓           | 9  |
| Lazzeri 2021       | ✓      | ✓ | ✓ | ✓ | ✓ | ✓ | ✓ | ✓ | ✓  | ✓  | ✓           | 10 |
| Lorusso 2021       | ✓      | ✓ | ✓ | ? | ? | X | X | ✓ | NA | ✓  | ✓           | 5  |
| Olivier 2021       | ✓      | ? | ? | ✓ | ✓ | ✓ | ✓ | ✓ | X  | ✓  | ✓           | 7  |
| Rabie 2021         | ✓      | ✓ | ? | ✓ | ✓ | ✓ | ✓ | ✓ | ✓  | ✓  | ✓           | 9  |
| Rajajee 2021       | ✓      | ✓ | ✓ | ✓ | ✓ | ✓ | ✓ | ✓ | X  | ✓  | ✓           | 9  |
| Rhoades 2021       | ✓      | ✓ | ? | ✓ | ✓ | ✓ | ✓ | ✓ | ✓  | ✓  | ✓           | 9  |
| Riera 2021         | ✓      | ✓ | ? | ✓ | ✓ | ✓ | X | ✓ | ✓  | ✓  | ✓           | 8  |
| Saeed 2021         | ✓      | ✓ | ✓ | ✓ | ✓ | ✓ | ✓ | ✓ | ✓  | ✓  | ✓           | 10 |
| Shah 2021          | X      | ✓ | ? | X | X | ✓ | ✓ | ✓ | X  | ✓  | ✓           | 5  |
| Supady 2021        | ✓      | ✓ | ✓ | ✓ | ✓ | ✓ | ✓ | ✓ | ✓  | ✓  | ✓           | 10 |
| Suwalski 2021      | ✓      | ✓ | ✓ | ✓ | ✓ | ✓ | ✓ | ✓ | ✓  | ✓  | ✓           | 10 |
| Tabatabai 2021     | ✓      | ✓ | ? | ✓ | ? | ✓ | ✓ | ✓ | X  | ✓  | ✓           | 7  |
| Ulukan 2021        | ✓      | ✓ | ✓ | ✓ | ? | ✓ | X | ✓ | X  | ✓  | ✓           | 7  |
| Zhang 2021         | ✓      | ✓ | ? | ✓ | ✓ | ✓ | ✓ | ✓ | X  | ✓  | ✓           | 8  |

*Domains:*

- 1: Were there clear criteria for inclusion in the case series?
- 2: Was the condition measured in a standard, reliable way for all participants included in the case series?
- 3: Were valid methods used for identification of the condition for all participants included in the case series?
- 4: Did the case series have consecutive inclusion of participants?
- 5: Did the case series have complete inclusion of participants?
- 6: Was there clear reporting of the demographics of the participants in the study?
- 7: Was there clear reporting of clinical information of the participants?
- 8: Were the outcomes or follow up results of cases clearly reported?
- 9: Was there clear reporting of the presenting site(s)/clinic(s) demographic information?
- 10: Was statistical analysis appropriate?

## Cohort studies

| Author          | Domain                                                              |   |   |   |   |    |   |   |   |    |    | Total score |
|-----------------|---------------------------------------------------------------------|---|---|---|---|----|---|---|---|----|----|-------------|
|                 | 1                                                                   | 2 | 3 | 4 | 5 | 6  | 7 | 8 | 9 | 10 | 11 |             |
| Alnababteh 2020 | ✓                                                                   | ✓ | ✓ | ✓ | X | ✓  | ✓ | X | ✓ | NA | ✓  | 8           |
| Barbaro 2021    | ✓                                                                   | ✓ | ✓ | ✓ | ✓ | ✓  | ✓ | ✓ | X | NA | ✓  | 9           |
| Bohman 2021     | ✓                                                                   | ✓ | ✓ | ✓ | X | ✓  | ✓ | ✓ | ✓ | NA | ✓  | 9           |
| Cheng 2021      | ✓                                                                   | ✓ | ✓ | ✓ | ✓ | ✓  | ✓ | ✓ | ✓ | NA | ✓  | 10          |
| Correa 2021     | ✓                                                                   | ✓ | ✓ | ✓ | X | ✓  | ✓ | ✓ | ✓ | NA | ✓  | 9           |
| Cousin 2020     | ✓                                                                   | ✓ | ✓ | ✓ | X | ✓  | ✓ | ✓ | ✓ | NA | ✓  | 9           |
| Durak 2021      | ✓                                                                   | ✓ | ✓ | ✓ | ✓ | NA | ✓ | ✓ | ✓ | NA | ✓  | 9           |
| Falcoz 2020     | ✓                                                                   | ✓ | ✓ | X | X | ✓  | ✓ | ✓ | ✓ | NA | ✓  | 8           |
| Jang 2020       | ✓                                                                   | ✓ | ✓ | ✓ | ✓ | ✓  | ✓ | X | ✓ | NA | ✓  | 9           |
| Lai 2021        | ✓                                                                   | ✓ | ✓ | X | X | NA | ✓ | ✓ | ✓ | NA | ✓  | 7           |
| Lebreton 2021   | ✓                                                                   | ✓ | ✓ | ✓ | ✓ | ✓  | ✓ | ✓ | ✓ | NA | ✓  | 10          |
| Li 2021         | ✓                                                                   | ✓ | ✓ | ✓ | ? | NA | ✓ | ✓ | ✓ | NA | ✓  | 8           |
| Loforte 2021    | ✓                                                                   | ✓ | ✓ | ✓ | ? | NA | ✓ | ✓ | ✓ | NA | ✓  | 8           |
| Murthy 2021     | ✓                                                                   | ✓ | ✓ | ? | ? | NA | ✓ | ✓ | ✓ | NA | ✓  | 7           |
| Nguyen 2021     | ✓                                                                   | ✓ | ✓ | ? | ? | NA | ✓ | ✓ | ✓ | NA | ✓  | 7           |
| O'Neil 2021     | ✓                                                                   | ✓ | ✓ | ✓ | ? | NA | ✓ | ✓ | ✓ | NA | ✓  | 8           |
| Raff 2021       | X                                                                   | ✓ | ✓ | ✓ | ✓ | NA | ✓ | ✓ | ✓ | NA | ✓  | 8           |
| Roedl 2021      | ✓                                                                   | ✓ | ✓ | ✓ | ✓ | ✓  | ✓ | ✓ | ✓ | NA | ✓  | 10          |
| Takeda 2020     | Not assessable: data extracted directly from Japan ECMONet registry |   |   |   |   |    |   |   |   |    |    |             |

### Domains:

- 1: Were the two groups similar and recruited from the same population?
- 2: Were the exposures measured similarly to assign people to both exposed and unexposed groups?
- 3: Was the exposure measured in a valid and reliable way?
- 4: Were confounding factors identified?
- 5: Were strategies to deal with confounding factors stated?
- 6: Were the groups/participants free of the outcome at the start of the study (or at the moment of exposure)?
- 7: Were the outcomes measured in a valid and reliable way?
- 8: Was the follow up time reported and sufficient to be long enough for outcomes to occur?
- 9: Was follow up complete, and if not, were the reasons to loss to follow up described and explored?
- 10: Were strategies to address incomplete follow up utilized?
- 11: Was appropriate statistical analysis used?

**Table S6.** Grading of Recommendations, Assessment, Development, and Evaluations

| № of studies                                                                                    | Certainty assessment  |              |                          |              |             |                      | Effect      |                  |                               | Certainty        | Importance |
|-------------------------------------------------------------------------------------------------|-----------------------|--------------|--------------------------|--------------|-------------|----------------------|-------------|------------------|-------------------------------|------------------|------------|
|                                                                                                 | Study design          | Risk of bias | Inconsistency            | Indirectness | Imprecision | Other considerations | № of events | № of individuals | Rate (95% CI)                 |                  |            |
| Mortality at longest time of follow up (assessed with: %)                                       |                       |              |                          |              |             |                      |             |                  |                               |                  |            |
| 52                                                                                              | observational studies | not serious  | not serious <sup>a</sup> | not serious  | not serious | none                 | -           | 18211            | mean 48.8 % (44.8 to 52.9)    | ⊕⊕⊕⊕<br>High     | CRITICAL   |
| Mortality for those receiving venovenous extracorporeal membrane oxygenation (assessed with: %) |                       |              |                          |              |             |                      |             |                  |                               |                  |            |
| 44                                                                                              | observational studies | not serious  | serious <sup>b</sup>     | not serious  | not serious | none                 | -           | 11992            | mean 47.2 % (44.1 to 53.0)    | ⊕⊕⊕○<br>Moderate | CRITICAL   |
| Duration of ECMO support (assessed with: days)                                                  |                       |              |                          |              |             |                      |             |                  |                               |                  |            |
| 35                                                                                              | observational studies | not serious  | serious <sup>b</sup>     | not serious  | not serious | none                 | -           | 9524             | mean 16.4 days (14.9 to 17.9) | ⊕⊕⊕○<br>Moderate | IMPORTANT  |
| Duration of intensive care unit stay (assessed with: days)                                      |                       |              |                          |              |             |                      |             |                  |                               |                  |            |
| 14                                                                                              | observational studies | not serious  | serious <sup>b</sup>     | not serious  | not serious | none                 | -           | 2095             | mean 33.5 days (29.4 to 37.6) | ⊕⊕⊕○<br>Moderate | IMPORTANT  |
| Duration of hospital stay (assessed with: days)                                                 |                       |              |                          |              |             |                      |             |                  |                               |                  |            |
| 15                                                                                              | observational studies | not serious  | serious <sup>b</sup>     | not serious  | not serious | none                 | -           | 1789             | mean 39.2 days (33.0 to 45.4) | ⊕⊕⊕○<br>Moderate | IMPORTANT  |

Explanations

a. There is significant heterogeneity quantitatively and qualitatively. However, subgroup and regression analysis were able to elucidate covariates responsible for the heterogeneity

b. There is significant quantitative and qualitative variability

**Table S7.** Summary of subgroup and meta-regression analysis*Subgroup analysis*

| Subgroup                                                              |                                                      | Studies | Mortality (%) | 95% confidence interval (%) |
|-----------------------------------------------------------------------|------------------------------------------------------|---------|---------------|-----------------------------|
| Geographical region<br>$p_{\text{interaction}} = 0.086$               | North America                                        | 17      | 41.2          | 35.2 to 47.5                |
|                                                                       | Europe                                               | 22      | 50.7          | 44.6 to 56.9                |
|                                                                       | Multiple ELSO regions                                | 3       | 47.9          | 44.3 to 51.4                |
|                                                                       | Asia-Pacific                                         | 6       | 58.6          | 45.3 to 70.7                |
|                                                                       | Latin America                                        | 2       | 43.9          | 30.1 to 58.8                |
|                                                                       | Southwest Asia and Africa                            | 2       | 71.3          | 33.5 to 92.5                |
| Timing of last patient enrolment<br>$p_{\text{interaction}} = 0.0013$ | 1 <sup>st</sup> half 2020<br>(January 1 to May 31)   | 12      | 41.2          | 30.6 to 52.8                |
|                                                                       | 2 <sup>nd</sup> half 2020<br>(June 1 to December 31) | 28      | 46.4          | 41.9 to 50.9                |
|                                                                       | 1 <sup>st</sup> half 2021<br>(January 1 to May 31)   | 10      | 62.0          | 54.8 to 68.7                |
|                                                                       | 2 <sup>nd</sup> half 2021<br>(June 1 to December 31) | 2       | 46.5          | 38.8 to 54.4                |

*Meta-regression analysis*

| Covariate                                   | Studies | B       | LCI     | UCI     | P*            |
|---------------------------------------------|---------|---------|---------|---------|---------------|
| Age                                         | 46      | 0.0443  | 0.0171  | 0.0714  | <b>0.0014</b> |
| Every 100 days after 1 January 2020         | 52      | 0.1611  | 0.0361  | 0.2861  | <b>0.012</b>  |
| Proportion of patients receiving steroids   | 25      | 1.2176  | 0.2494  | 2.1858  | <b>0.014</b>  |
| Duration of ECMO                            | 35      | -0.0332 | 0.0663  | -0.0001 | <b>0.049</b>  |
| Time from IMV to ECMO                       | 32      | 0.0574  | -0.0307 | 0.1454  | 0.20          |
| BMI                                         | 32      | -0.0345 | -0.1230 | 0.0540  | 0.44          |
| Proportion of males                         | 48      | -0.2390 | -1.2732 | 0.7952  | 0.65          |
| SOFA score                                  | 23      | 0.0217  | -0.0851 | 0.1285  | 0.69          |
| Proportion of patients receiving IL-6A      | 10      | -1.5557 | -3.3165 | 0.2051  | 0.083         |
| PaO <sub>2</sub> -to-FiO <sub>2</sub> ratio | 36      | -0.0073 | -0.0220 | 0.0075  | 0.33          |
| Time from symptoms to initiation of IMV     | 12      | 0.0432  | -0.0228 | 0.1092  | 0.20          |

Abbreviations: B: regression coefficient, BMI: body mass index, ECMO: extracorporeal membrane oxygenation, IL-6A: interleukin-6 antagonists, IMV: invasive mechanical ventilation LCI: lower confidence interval, P: P-value, SOFA: sequential organ failure assessment UCI: upper confidence interval

\*Values in bold indicate p-value < 0.05.



**Table S8:** Complications reported by included studies

| Author             | Complication                                                                                                  |                                                               |                                                                        |                                      |                                           |                                      |                                           |                                           |                               |                                                        |                                               |
|--------------------|---------------------------------------------------------------------------------------------------------------|---------------------------------------------------------------|------------------------------------------------------------------------|--------------------------------------|-------------------------------------------|--------------------------------------|-------------------------------------------|-------------------------------------------|-------------------------------|--------------------------------------------------------|-----------------------------------------------|
|                    | Mechanical                                                                                                    | Haemorrhagic                                                  | Neurologic                                                             | Renal                                | Cardiovascular                            | Pulmonary                            | Infectious                                | Metabolic                                 | Limb                          | Others                                                 | Patients suffering from $\geq 1$ complication |
| Agerstrand 2020    | 12 oxygenator failure                                                                                         | 13 bleeding                                                   | 2 CVA                                                                  | 10 RRT                               |                                           | 5 PTX                                | 1 cannula site infection                  |                                           |                               | 3 haemolysis                                           | -                                             |
| Akhtar 2021        | 6 cannula change<br>5 circuit change                                                                          |                                                               | 2 ICH                                                                  |                                      |                                           |                                      |                                           |                                           |                               |                                                        |                                               |
| Alnababteh 2020    | 2 oxygenator change<br>1 dislodged cannula                                                                    | 7 bleeding                                                    |                                                                        | 6 RRT                                |                                           | 4 pneumonia                          | 2 bacteraemia                             | 1 liver failure<br>2 coagulopathy         | 2 digital ischemia            |                                                        |                                               |
| Arachchillage 2021 | 15 circuit clot                                                                                               | 5 BGIT<br>3 major bleed                                       | 16 ICH                                                                 |                                      |                                           | 12 pulmonary haemorrhage             |                                           |                                           |                               | 68 venous thrombosis<br>45 PE<br>13 DVT<br>10 combined | -                                             |
| Barbaro 2021       | 543 membrane lung failure<br>50 pump failure<br>699 circuit change<br>356 cannula problem<br>174 circuit clot | 347 BGIT<br>320 cannula site bleed<br>233 surgical site bleed | 31 seizures<br>67 CNS infarct<br>302 CNS haemorrhage<br>52 brain death | 453 SCr > 1.5-3 mg/dL<br>217 SCr > 3 | 443 arrhythmia<br>245 CPR<br>42 tamponade | 533 PTX<br>176 pulmonary haemorrhage |                                           | 301 haemolysis<br>210 hyperbilirubinaemia | 15 fasciotomy<br>4 amputation |                                                        | 2090                                          |
| Bergman 2021       |                                                                                                               |                                                               |                                                                        | 21 RRT                               |                                           |                                      |                                           |                                           |                               |                                                        | -                                             |
| Bermea 2021        | 2 circuit failure                                                                                             | 17 bleeding                                                   | 11 ICH                                                                 | 14 RRT                               |                                           | 2 pulmonary haemorrhage              |                                           |                                           |                               | 5 VTE<br>2 MOF                                         | -                                             |
| Bohman 2021        | Complications were not reported                                                                               |                                                               |                                                                        |                                      |                                           |                                      |                                           |                                           |                               |                                                        | NA                                            |
| Broman 2021        | Complications were not reported                                                                               |                                                               |                                                                        |                                      |                                           |                                      |                                           |                                           |                               |                                                        | NA                                            |
| Cain 2021          | Complications were not reported                                                                               |                                                               |                                                                        |                                      |                                           |                                      |                                           |                                           |                               |                                                        | NA                                            |
| Chandel 2021       |                                                                                                               | 1 haemoptysis<br>1 BGIT                                       |                                                                        |                                      |                                           |                                      |                                           |                                           |                               |                                                        | 2                                             |
| Cheng 2021         | 2 circuit obstruction<br>1 prolapse                                                                           | 25 BGIT<br>6 surgical site bleed                              |                                                                        |                                      |                                           | 12 pulmonary haemorrhage             | 2 SSI<br>13 BSI<br>28 pulmonary infection | 7 haemolysis                              |                               |                                                        | -                                             |
| Cousin 2020        | 6 oxygenator failure                                                                                          | 14 cannula site bleed<br>13 major bleed                       | 1 ischemic stroke, 3 haemorrhagic strokes                              | 15 AKI                               |                                           |                                      | 4 BSI                                     |                                           |                               | 2 PE<br>3 DVT                                          |                                               |

|                    |                                                  |                                                            |                                                     |                    |                        |                                        |                                                                |                        |  |                                                               |    |
|--------------------|--------------------------------------------------|------------------------------------------------------------|-----------------------------------------------------|--------------------|------------------------|----------------------------------------|----------------------------------------------------------------|------------------------|--|---------------------------------------------------------------|----|
|                    | 2 oxygenator thrombosis                          |                                                            |                                                     |                    |                        |                                        |                                                                |                        |  |                                                               |    |
| Daviet 2021        | 11 circuit clot<br>30 circuit change             | 42 major bleeding                                          |                                                     | 25 RRT             |                        |                                        | 45 VAP<br>33 bacteraemia<br>45 septic shock<br>32CMV<br>21 HSV | 34 haemolysis<br>3 HIT |  | 36<br>34 DVT/PE                                               | -  |
| Diaz 2021          | 20 oxygenator failure                            | 33 bleeding                                                | 10 neurologic complications, 11 haemorrhagic stroke |                    |                        | 12 PTX                                 | 60 HAI<br>44 VAP                                               |                        |  | 19 VTE                                                        | -  |
| Dognon 2021        | 20 circuit change                                | 32 cannula site bleed<br>33 other bleed                    | 2 ischemic stroke<br>6 haemorrhagic stroke          | 22 RRT             | 3 CPR                  | 7 PTX                                  | 30 BSI<br>33 VAP                                               | 11 massive haemolysis  |  | 8 thrombosis                                                  | -  |
| Dreier 2021        | 9 oxygenator replacement                         | 1 BGIT                                                     | 1 ICH                                               |                    |                        | 1 PTX                                  |                                                                |                        |  | 4 acute liver failure<br>1 GI ischaemia<br>6 PE               | -  |
| Durak 2021         | 3 circuit thrombosis                             | 9 mucosal bleed<br>6 cannula site bleed<br>3 BGIT          | 3 cerebral bleed                                    | 28 AKI (stage 2-3) | 3 cardiac tamponade    | 9 endobronchial bleed<br>1 haemothorax |                                                                |                        |  | 8 PA embolism<br>5 venous thrombosis<br>2 arterial thrombosis | -  |
| Falcoz 2020        | 2 oxygenator thrombosis                          | 1 haemorrhagic shock<br>61 BGIT<br>5 cannula site bleeding | 1 stroke                                            | 12 RRT             | 1 cardiac tamponade    |                                        | 10 VAP                                                         |                        |  | 3 thrombophlebitis/PE<br>1 thrombocytopenia                   |    |
| Fang 2021          | Complications were not reported                  |                                                            |                                                     |                    |                        |                                        |                                                                |                        |  |                                                               | NA |
| Huette 2020        | 3 circuit thrombosis<br>2 RRT circuit thrombosis | 3 massive bleeding                                         |                                                     | 11 AKI<br>8 RRT    | 1 CPR                  | 3 PTX                                  | 10 VAP                                                         |                        |  | 2 acute liver failure<br>1 HIT<br>1 PE<br>4 DVT               |    |
| Jacobs 2021        |                                                  |                                                            | 5 ICH<br>2 CNS injury                               |                    | 6 CPR                  | 1 PTX                                  | 7 sepsis                                                       |                        |  | 12 MOF<br>8 DIC<br>1 air embolism<br>1 PE                     | 43 |
| Jang 2020          |                                                  |                                                            | 4 hypoxic brain damage<br>1 seizure                 | 9 AKI              | 1 acute cardiac injury | 3 pulmonary haemorrhage<br>3 PTX       |                                                                |                        |  |                                                               |    |
| Jozwiak 2020       |                                                  | 8 transfusions                                             |                                                     |                    |                        |                                        |                                                                |                        |  |                                                               |    |
| Karagiannidis 2021 | Complications were not reported                  |                                                            |                                                     |                    |                        |                                        |                                                                |                        |  |                                                               | NA |

|               |                                              |                                  |                                             |                   |        |                                  |                                 |  |                                                        |                                                                                     |     |
|---------------|----------------------------------------------|----------------------------------|---------------------------------------------|-------------------|--------|----------------------------------|---------------------------------|--|--------------------------------------------------------|-------------------------------------------------------------------------------------|-----|
| Kon 2021      | 1 cannula repositioning                      | 1 bleeding                       |                                             | 2 RRT             |        | 4 PTX                            | 16 superinfection               |  |                                                        | 5 DVT                                                                               | 11? |
| Lai 2021      | 3 thrombi                                    | 39 bleeding                      |                                             |                   |        | 3 PTX                            | 16 secondary infection          |  |                                                        | 13 thrombocytopenia                                                                 | -   |
| Lazzeri 2021  |                                              |                                  |                                             | 2 AKI needing RRT |        |                                  |                                 |  |                                                        |                                                                                     | 2   |
| Lebreton 2021 | 31 circuit thrombosis<br>39 ECMO/line change | 115 major bleed                  | 27 ICH<br>6 ischemic stroke                 | 130 RRT           | 46 CPR | 23 PTX<br>53 PE                  | 257 VAP<br>45 cannula infection |  |                                                        | 55 Severe thrombocytopenia                                                          | -   |
| Li 2021       | 3 oxygenator failure                         | 4e BGIT                          | 2 ICH<br>1 airway bleed<br>18 other bleed   |                   |        | 1 pulmonary haemorrhage<br>4 PTX | 8 infectious complications      |  |                                                        |                                                                                     | 28  |
| Loforte 2021  | 10 circuit change                            | 9 major bleed                    | 6 strokes                                   | 3 RRT             |        | 4 PE                             | 39 pneumonia<br>14 sepsis       |  |                                                        | 2 DVT<br>14 MOF                                                                     | -   |
| Lorusso 2021  | Complications were not reported              |                                  |                                             |                   |        |                                  |                                 |  |                                                        |                                                                                     | NA  |
| Murthy 2021   | 12 oxygenator failure                        |                                  |                                             |                   |        |                                  |                                 |  |                                                        |                                                                                     | 12  |
| Nguyen 2021   | Complications were not reported              |                                  |                                             |                   |        |                                  |                                 |  |                                                        |                                                                                     | NA  |
| O'Neil 2021   | Complications were not reported              |                                  |                                             |                   |        |                                  |                                 |  |                                                        |                                                                                     | NA  |
| Olivier 2021  |                                              | 48 bleed                         |                                             |                   |        |                                  | 37 infections                   |  |                                                        | 19 haemolysis                                                                       | 29? |
| Rabie 2021    | 29 membrane lung failure                     | 73 major bleed<br>36 minor bleed |                                             | 98 RRT            | 49 CPR | 24 PTX<br>15 PE                  | 214 secondary infections        |  |                                                        | 2 DVT                                                                               | -   |
| Raff 2021     |                                              | 22 minor bleed<br>3 major bleed  |                                             |                   |        |                                  |                                 |  |                                                        | 14 MOF                                                                              | 22  |
| Rajajee 2021  | Complications were not reported              |                                  |                                             |                   |        |                                  |                                 |  |                                                        |                                                                                     | NA  |
| Rhoades 2021  |                                              | 15 major bleeding                |                                             | 8 RRT             |        |                                  |                                 |  |                                                        | 1 portal vein thrombus (age-indeterminate)<br>1 splenic infarct (age-indeterminate) | -   |
| Riera 2021    | Complications were not reported              |                                  |                                             |                   |        |                                  |                                 |  |                                                        |                                                                                     | NA  |
| Roedl 2021    |                                              | 50 bleeding                      |                                             |                   |        |                                  |                                 |  | 5 non-severe limb ischaemia<br>5 severe limb ischaemia | 18 DVT<br>3 PE<br>11 HIT<br>6 DIC                                                   | -   |
| Saeed 2021    | 26 circuit exchange                          | 145 major bleed                  | 17 haemorrhagic stroke<br>4 ischemic stroke | 93 RRT            |        |                                  | 153 secondary infections        |  | 7 limb ischemia                                        | 42 DVT                                                                              | -   |

|                |                                 |                                                                                                                                               |                             |        |                                 |                            |                          |                           |                      |                |    |
|----------------|---------------------------------|-----------------------------------------------------------------------------------------------------------------------------------------------|-----------------------------|--------|---------------------------------|----------------------------|--------------------------|---------------------------|----------------------|----------------|----|
| Shah 2021      | Complications were not reported |                                                                                                                                               |                             |        |                                 |                            |                          |                           |                      |                | NA |
| Supady 2021    |                                 |                                                                                                                                               |                             | 73 RRT |                                 |                            |                          |                           |                      |                | 73 |
| Suwalski 2021  | 2 circuit complications         | 53 massive bleed                                                                                                                              | 5 strokes                   | 24 RRT | 16 cardiovascular complications | 14 pulmonary complications | 33 sepsis                | 7 metabolic complications | 4 limb complications | 16 MOF         | -  |
| Tabatabai 2021 |                                 | 6 cannula site bleed<br>3 MSK bleed<br>3 intraabdominal bleed<br>7 GU bleed<br>6 BGIT<br>1 cardiac bleed<br>12 auricular/nasopharyngeal bleed | 1 ICH                       |        |                                 |                            | 10 pulmonary haemorrhage |                           |                      | 17 thrombotic  | -  |
| Takeda 2020    | Complications were not reported |                                                                                                                                               |                             |        |                                 |                            |                          |                           |                      |                | NA |
| Ulukan 2021    | Complications were not reported |                                                                                                                                               |                             |        |                                 |                            |                          |                           |                      |                | NA |
| Zhang 2021     |                                 | 1 major bleed                                                                                                                                 | 2 ICH<br>2 ischaemic stroke | 22 RRT | 2 cardiac tamponade             | 15 PTX                     |                          |                           |                      | 7 MOF<br>15 PE | -  |

Abbreviations: AKI: Acute kidney injury, BGIT: Bleeding gastrointestinal tract, BSI: Bloodstream infection, CMV: Cytomegalovirus, CNS: Central nervous system, CPR: Cardiopulmonary resuscitation, CVA: Cerebrovascular accident, DIC: Disseminated intravascular coagulation, DVT: Deep vein thrombosis, GI: gastrointestinal, GU: Genitourinary, HIT: Heparin-induced thrombocytopenia, HSV; Herpes simplex virus, ICH: Intracranial haemorrhage, MOF: multiorgan failure, PE: pulmonary embolism, PTX: pneumothorax, RRT: renal replacement therapy, SCr: serum creatinine, SSI: Surgical site infection, VAP: ventialtor-associated pneumonia, VTE: venous thromboembolism.
